# Supplementary material
Source: ML conference proceedings conference paper supplement (https://proceedings.neurips.cc/paper_files/paper/2017/hash/fc79250f8c5b804390e8da280b4cf06e-Abstract.html)
Supplement: Supplementary file [file fc79250f8c5b804390e8da280b4cf06e-Supplemental.zip]

---

# Balancing information exposure in social networks

## Supplementary material

---

**Kiran Garimella**  
Aalto University & HIIT  
Helsinki, Finland  
kiran.garimella@aalto.fi

**Aristides Gionis**  
Aalto University & HIIT  
Helsinki, Finland  
aristides.gionis@aalto.fi

**Nikos Parotsidis**  
University of Rome Tor Vergata  
Rome, Italy  
nikos.parotsidis@uniroma2.it

**Nikolaj Tatti**  
Aalto University & HIIT  
Helsinki, Finland  
nikolaj.tatti@aalto.fi

### A Proof of Proposition 1

*Proof.* To prove the hardness we will use SET COVER. Here, we are given a universe  $U$  and family of sets  $C_1, \dots, C_\ell$ , and we are asked to select  $k$  sets covering the universe  $U$ .

To map this instance to our problem, we first define vertex set  $V$  to consist of 3 parts,  $V_1$ ,  $V_2$  and  $V_3$ . The first part corresponds to the universe  $U$ . The second part consists of  $k$  copies of  $\ell$  vertices,  $i$ th vertex in  $j$ th copy corresponds to  $C_i$ . The third part consists of  $k$  vertices  $b_j$ . The edges are as follows: a vertex  $v$  in the  $j$ th copy, corresponding to a set  $C_i$  is connected to the vertices corresponding to the elements in  $C_i$ , furthermore  $v$  is connected to  $b_j$ . We set  $p_1 = p_2 = 1$ . The initial seeds are  $I_1 = \emptyset$  and  $I_2 = V_1 \cup V_3$ . We set the budget to  $2k$ .

Assume that there is a  $k$ -cover,  $C_{i_1}, \dots, C_{i_k}$ . We set

$$S_1 = S_2 = \{ \text{vertex corresponding to } C_{i_j} \text{ in } j\text{th copy} \}.$$

It is easy to see that the imbalanced vertices in  $I_2$  are exposed to the first campaign. Moreover,  $S_1$  and  $S_2$  do not introduce new imbalanced vertices. This makes the objective equals to 0.

Assume that there exists a solution  $S_1$  and  $S_2$  with a zero cost. We claim that  $|S_1 \cap (V_1 \cup V_2)| \leq k$ . To prove this, first note that  $S_1 \cap V_2 = S_2 \cap V_2$ , as otherwise vertices in  $V_2$  are left unbalanced. Let  $m = |S_1 \cap V_2|$ . Since  $V_3$  must be balanced and each vertex in  $V_2$  has only one edge to a vertex in  $V_3$ , there at least  $k$  vertices in  $|S_1 \cap \{V_2 \cup V_3\}|$ , that is, we must have  $|S_1 \cap V_3| \geq k - m$ . Let us write  $d_{ij} = |S_i \cap V_j|$ . The budget constraints guarantee that

$$d_{11} + d_{12} + d_{22} + d_{13} \leq \sum_{ij} d_{ij} \leq 2k,$$

which can be rewritten as

$$d_{11} + d_{12} \leq 2k - d_{22} - d_{13} \leq 2k - m - (k - m) = k.$$

Construct  $C$  as follows: for each  $S_1 \cap V_2$ , select the set that corresponds to the vertex, for each  $S_1 \cap V_1$ , select any set that contain this vertex (there is always at least one set, otherwise the problem is trivially false). Since  $V_1$  must be balanced,  $C$  is a  $k$ -cover of  $U$ .  $\square$

## B Proof of Lemma 2

Before providing the proof, as a technicality, note that submodularity is usually defined for functions with one argument. Namely, given a universe of items  $U$ , we consider functions of the type  $f : 2^U \rightarrow \mathbb{R}$ . However, by taking  $U = V \times \{1, 2\}$  we can equivalently write our objectives as functions with one argument, i.e.,  $\Phi, \Omega, \Psi : 2^U \rightarrow \mathbb{R}$ .

*Proof.* The objective counts 3 types of vertices: (i) vertices covered by both initial seeds, (ii) additional vertices covered by  $I_1$  and  $S_2$ , and (iii) additional vertices covered by  $I_2$  and  $S_1$ . This allows us to decompose the objective as

$$\Omega(S_1, S_2) = \mathbb{E}[|A| + |B| + |C|], \quad \text{where}$$

$$A = r_1(I_1) \cap r_2(I_2), \quad B = (r_1(I_1) \setminus r_2(I_2)) \cap r_2(S_2), \quad C = (r_2(I_2) \setminus r_1(I_1)) \cap r_1(S_1).$$

Note that  $A$  does not depend on  $S_1$  and  $S_2$ .  $B$  grows in size as we add more vertices to  $S_2$ , and  $C$  grows in size as we add more vertices to  $S_1$ . This proves that the objective is monotone.

To prove the submodularity, let us introduce some notation: given a set of edges  $F$ , we write  $r(S; F)$  to be the set of vertices that can be reached from  $S$  via  $F$ . This allows us to define

$$\begin{aligned} A(F_1, F_2) &= r(I_1; F_1) \cap r(I_2; F_2), \\ B(F_1, F_2) &= (r(I_1; F_1) \setminus r(I_2; F_2)) \cap r(S_2; F_2), \\ C(F_1, F_2) &= (r(I_2; F_2) \setminus r(I_1; F_1)) \cap r(S_1; F_1). \end{aligned}$$

The score  $\Omega(S_1, S_2)$  can be rewritten as

$$\sum_{F_1, F_2} p(F_1, F_2) (|A(F_1, F_2)| + |B(F_1, F_2)| + |C(F_1, F_2)|),$$

where  $p(F_1, F_2)$  is the probability of  $F_1$  being the realization of the edges for the first campaign and  $F_2$  being the realization of the edges for the second campaign.

The first term  $A(F_1, F_2)$  does not depend on  $S_1$  or  $S_2$ . The second term is submodular as a function of  $S_2$  and does not depend of  $S_1$ . The third term is submodular as a function of  $S_1$  and does not depend of  $S_2$ . Since any linear combination of submodular function weighted by positive coefficients is also submodular, this completes the proof.  $\square$

## C Proof of Proposition 3

*Proof.* Write  $c = 1 - 1/e$ . Let  $\langle S'_1, S'_2 \rangle$  be the optimal solution maximizing  $\Omega$ . Lemma 2 shows that  $\Omega(S_1, S_2) \geq c\Omega(S'_1, S'_2)$ .

Note that  $\Psi(\emptyset, \emptyset) \geq \Psi(S_1^*, S_2^*)$  as the first term is the average of vertices not affected by the initial seeds. Thus,

$$\begin{aligned} \Phi(S_1^*, S_2^*) &= \Omega(S_1^*, S_2^*) + \Psi(S_1^*, S_2^*) \leq \Omega(S'_1, S'_2) + \Psi(S_1^*, S_2^*) \\ &\leq \Omega(S'_1, S'_2) + \Psi(\emptyset, \emptyset) \leq \Omega(S_1, S_2)/c + \Psi(\emptyset, \emptyset) \\ &\leq \Omega(S_1, S_2)/c + \Psi(\emptyset, \emptyset)/c \\ &\leq (2/c) \max\{\Omega(S_1, S_2), \Psi(\emptyset, \emptyset)\} \\ &\leq (2/c) \max\{\Phi(S_1, S_2), \Phi(\emptyset, \emptyset)\}, \end{aligned}$$

which completes the proof.  $\square$

## D Proof of Lemma 4

*Proof.* As we are dealing with the correlated setting, we can write  $r(S) = r_1(S) = r_2(S)$ . Our first step is to decompose  $\omega = \Phi_C(S_1, S_2)$  into several components. To do so, we partition the vertices based on their reachability from the initial seeds,

$$\begin{aligned} A &= r(I_1) \cap r(I_2), & B &= r(I_1) \setminus r(I_2), \\ C &= r(I_2) \setminus r(I_1), & D &= V \setminus (r(I_1) \cup r(I_2)). \end{aligned}$$

Note that these are all random variables. If  $S_1 = S_2 = \emptyset$ , then  $\Phi_C(S_1, S_2) = \mathbb{E}_C[|A| + |D|]$ . More generally,  $S_1$  may balance some vertices in  $C$ , and  $S_2$  may balance some vertices in  $B$ . We may also introduce new imbalanced vertices in  $D$ . To take this into account we define

$$\begin{aligned} B' &= B \cap r(S_2), & C' &= C \cap r(S_1), \\ D' &= D \setminus (r(S_1) \triangle r(S_2)). \end{aligned}$$

We can express the cost of  $\Phi_C(S_1, S_2)$  as

$$\omega = \Phi_C(S_1, S_2) = \mathbb{E}_C[|A| + |B'| + |C'| + |D'|].$$

Split  $S_1 \cup S_2$  in two equal-size sets,  $T$  and  $Q$ , and define

$$\omega_1 = \Phi_C(T, T), \quad \omega_2 = \Phi_C(Q, Q).$$

We claim that  $\omega \leq \omega_1 + \omega_2$ . This proves the proposition, since  $\omega_1 + \omega_2 \leq 2 \max\{\omega_1, \omega_2\}$ .

To prove the claim let us first split  $T$  and  $Q$ ,

$$T_1 = T \cap S_1, \quad T_2 = T \cap S_2, \quad Q_1 = Q \cap S_1, \quad Q_2 = Q \cap S_2.$$

Our next step is to decompose  $\omega_1$  and  $\omega_2$ , similar to  $\omega$ . To do that, we define

$$\begin{aligned} B_1 &= B \cap r(T_2), & B_2 &= B \cap r(Q_2), \\ C_1 &= C \cap r(T_1), & C_2 &= C \cap r(Q_1). \end{aligned}$$

Note that, the pair  $\langle T, T \rangle$  does not introduce new imbalanced nodes. This leads to

$$\omega_1 = \Phi_C(T, T) = \mathbb{E}_C[|A| + |B_1| + |C_1| + |D|],$$

and similarly,

$$\omega_2 = \Phi_C(Q, Q) = \mathbb{E}_C[|A| + |B_2| + |C_2| + |D|].$$

To prove  $\omega \leq \omega_1 + \omega_2$ , note that  $|D'| \leq |D|$ . In addition,

$$\begin{aligned} |B'| &= |B \cap (r(T_2) \cup r(Q_2))| \\ &\leq |B \cap r(T_2)| + |B \cap r(Q_2)| = |B_1| + |B_2| \end{aligned}$$

and

$$\begin{aligned} |C'| &= |C \cap (r(T_1) \cup r(Q_1))| \\ &\leq |C \cap r(T_1)| + |C \cap r(Q_1)| = |C_1| + |C_2|. \end{aligned}$$

Combining these inequalities proves the proposition.  $\square$

## E Proof of Proposition 5

To prove the proposition, we need the following technical lemma, which is a twist of a standard technique for proving the approximation ratio of the greedy algorithm on submodular functions.

**Lemma 1.** *Assume a universe  $U$ . Let  $f : 2^U \rightarrow \mathbb{R}$  be a positive function. Let  $T \subseteq U$  be a set with  $k$  elements. Let  $C_0 \subseteq \dots \subseteq C_k$  be a sequence of subsets of  $U$ . Assume that  $f(C_i) \geq \max_{t \in T} f(C_{i-1} \cup \{t\})$ .*

*Assume further that for each  $i = 1, \dots, k$ , we can decompose  $f$  as  $f = g_i + h_i$  such that*

1.  $g_i$  is submodular and monotonically increasing function,
2.  $h_i(W) = h_i(C_{i-1})$ , for any  $W \subseteq T \cup C_{i-1}$ .

*Then  $f(C_k) \geq (1 - 1/e)f(T)$ .*

*Proof.* The assumptions of the propositions imply

$$\begin{aligned}
f(T) &= g_i(T) + h_i(T) \\
&= g_i(T) + h_i(C_{i-1}) \\
&\leq g_i(C_{i-1}) + h_i(C_{i-1}) + \sum_{t \in T} g_i(C_{i-1} \cup \{t\}) - g_i(C_{i-1}) \\
&= f(C_{i-1}) + \sum_{t \in T} h_i(C_{i-1}) + g_i(C_{i-1} \cup \{t\}) - g_i(C_{i-1}) - h_i(C_{i-1}) \\
&= f(C_{i-1}) + \sum_{t \in T} h_i(C_{i-1} \cup \{t\}) + g_i(C_{i-1} \cup \{t\}) - g_i(C_{i-1}) - h_i(C_{i-1}) \\
&= f(C_{i-1}) + \sum_{t \in T} f(C_{i-1} \cup \{t\}) - f(C_{i-1}) \\
&\leq f(C_{i-1}) + k(f(C_i) - f(C_{i-1})),
\end{aligned}$$

where the first inequality is due to the submodularity of  $g_i$ , and is a standard trick to prove the approximation ratio for the greedy algorithm.

We can rewrite the above inequality as

$$kf(T) + (1 - k)f(T) = f(T) \leq f(C_{i-1}) + k(f(C_i) - f(C_{i-1})).$$

Rearranging the terms leads to

$$\frac{k-1}{k}(f(C_{i-1}) - f(T)) \leq f(C_i) - f(T) \quad .$$

Applying induction over  $i$ , yields

$$f(C_k) - f(T) \geq \left(\frac{k-1}{k}\right)^k (f(C_0) - f(T)) \geq \frac{1}{e}(f(C_0) - f(T)) \geq -f(T)/e,$$

leading to  $f(C_k) \geq (1 - 1/e)f(T)$ . □

We can now prove the main claim. Note that since we are using the correlated model, we have  $r_1 = r_2$ . For notational simplicity, we will write  $r = r_1 = r_2$ .

*Proof of Proposition 5.* Let  $OPT$  be the cost of the optimal solution. Let  $D$  be the solution maximizing  $\Phi_C(D, D)$  with  $|D| \leq k/2$ . Lemma 4 guarantees that  $OPT/2 \leq \Phi_C(D, D)$ .

In order to apply Lemma 6, we first define the universe  $U$  as

$$U = \{\langle u, v \rangle \mid u, v \in V\} \cup \{\langle v, \emptyset \rangle \mid v \in V\} \cup \{\langle \emptyset, v \rangle \mid v \in V\}.$$

The sets are defined as

$$C_i = \{\langle v, \emptyset \rangle \mid v \in S_1^i\} \cup \{\langle \emptyset, v \rangle \mid v \in S_2^i\}.$$

Given a set  $C \subseteq U$ , let us define  $\pi_1(C) = \{v \mid \langle v, u \rangle \in C, v \neq \emptyset\}$  to be the union of the first entries in  $C$ . Similarly, define  $\pi_2(C) = \{v \mid \langle u, v \rangle \in C, v \neq \emptyset\}$ .

We can now define  $f$  as  $f(C) = \Phi_C(\pi_1(C), \pi_2(C))$ . To decompose  $f$ , let us first write

$$X_i = r(I_1 \cup \pi_1(C_{i-1})) \cup r(I_2 \cup \pi_2(C_{i-1})) = r(I_1 \cup S_1^{i-1}) \cup r(I_2 \cup S_2^{i-1}), \quad Y_i = V \setminus X_i.$$

and set

$$\begin{aligned}
g_i(C) &= \mathbb{E}[|X_i \setminus (r(I_1 \cup \pi_1(C)) \triangle r(I_2 \cup \pi_2(C)))|], \\
h_i(C) &= \mathbb{E}[|Y_i \setminus (r(I_1 \cup \pi_1(C)) \triangle r(I_2 \cup \pi_2(C)))|].
\end{aligned}$$

Finally, we set  $T = \{\langle d, d \rangle \mid d \in D\}$ .

First note that  $f = g_i + h_i$  since  $X_i \cap Y_i = \emptyset$ . The proof of Lemma 2 shows that  $g_i$  is monotonically increasing and submodular.

Let  $C \subseteq C_{i-1} \cup T$ . If there is a vertex  $v$  in  $r(I_1 \cup \pi_1(C))$  but not in  $X_i$ , then this means  $v$  was influenced by  $d \in D$ . Since  $d \in \pi_2(C)$ , we have  $v \in r(I_2 \cup \pi_2(C))$ . That is,

$$r(I_1 \cup \pi_1(C)) \setminus X_i = r(I_2 \cup \pi_2(C)) \setminus X_i.$$

Since  $Y_i$  and  $X_i$  are disjoint, this gives us

$$\begin{aligned} h_i(C) &= \mathbb{E}[|Y_i \setminus (r(I_1 \cup \pi_1(C)) \triangle r(I_2 \cup \pi_2(C)))|] \\ &= \mathbb{E}[|Y_i \setminus ((r(I_1 \cup \pi_1(C)) \setminus X_i) \triangle (r(I_2 \cup \pi_2(C)) \setminus X_i))|] \\ &= \mathbb{E}[|Y_i|]. \end{aligned}$$

That is,  $h_i(C)$  is constant for any  $C \subseteq C_{i-1} \cup T$ . Thus,  $h_i(C) = h_i(C_{i-1})$ .

Finally, the assumption of the proposition guarantees that  $f(C_i) \geq f(C_{i-1} \cup \{t\})$ , for  $t \in T$ .

Thus, these definitions meet all the prerequisites of Lemma 6, guaranteeing that

$$(1 - 1/e)\Phi_C(D, D) \leq \Phi_C(S_1^{k/2}, S_2^{k/2}) \leq \Phi_C(S_1^k, S_2^k).$$

Since  $OPT/2 \leq \Phi_C(D, D)$ , the result follows.  $\square$

## F Additional tables and figures related to the experimental evaluation

Table 1: Dataset descriptions, as well as tags and retweets that were used to collect the data.

**USElections:** Tweets containing hashtags and keywords identifying the USElections, such as #uselections, #trump2016, #hillary2016, etc. Collected using Twitter 1% sample for 2 weeks in September 2016

*Pro-Hillary*

RT @hillaryclinton, #hillary2016, #clin-tonkaine2016, #imwithher

*Pro-Trump*

RT @realdonaldtrump, #makeamericagreatagain, #trump Pence16, #trump2016

**Brexit:** Tweets containing hashtags #brexit, #voterremain, #voteleave, #eureferendum for all of June 2016, from the 1% Twitter sample.

*Pro-Remain*

#voterremain, #strongerin, #remain, #re-maineu, #votein

*Pro-Leave*

#voteleave, #strongerout, #leaveeu, #takecontrol, #leave, #voteout

**Abortion:** Tweets containing hashtags #abortion, #prolife, #prochoice, #anti-abortion, #pro-abortion, #plannedparenthood from Oct 2011 to Aug 2016.

*Pro-Choice*

RT @thinkprogress, RT @komenforthe-cure, RT @mentalabortions, #waronwomen, toendabortion, #prolifeyouth, #prolife, #de-#nbprochoice, #prochoice, #standwithpp, fundplannedparenthood, #defundpp, #unborn-#reprorights

*Pro-Life*

RT @stevenertelt, RT @lifenewshq, #pray-livesmatter

**Obamacare:** Tweets containing hashtags #obamacare, and #aca from Oct 2011 to Aug 2016.

*Pro-Obamacare*

RT @barackobama, RT @lolgop, RT @charlespgarcia, RT @defendobamacare, RT @thinkprogress, #obamacares, #enoughal-ready, #uniteblue

*Anti-Obamacare*

RT @sentedcruz, RT @realdonaldtrump, RT @mittromney, RT @breitbartnews, RT @tedcruz, #defundobamacare, #makedclisten, #fullrepeal, #dontfundit

**Fracking:** Tweets containing hashtags and keywords #fracking, 'hydraulic fracturing', 'shale', 'horizontal drilling', from Oct 2011 to Aug 2016.

*Pro-Fracking*

RT @shalemarkets, RT @energyindepth, RT @shalefacts, #fracknation, #frackingez, #oi-landgas, #greatgasgala, #shalegas

*Anti-Fracking*

RT @greenpeaceuk, RT @greenpeace, RT @ecowatch, #environment, #banfracking, #keepitintheground, #dontfrack, #globalfrack-down, #stopthefrackattack

**iPhone vs. Samsung:** Tweets containing hashtags #iphone, and #samsung from April (re-release of Samsung Galaxy S7), and September 2015 (release of iPhone 7).

*Pro-iPhone*

#iphone

*Pro-Samsung*

#samsung

Table 2: Dataset statistics. The column  $|C|$  refers to the average number of edges in a randomly generated cascade in the correlated case, while  $|C_1|$  and  $|C_2|$  refer to average number of edges generated in a cascade of the campaigns 1 and 2, respectively, in the heterogeneous case.

| Dataset      | # Nodes | # Edges   | $ C $ | $ C_1 $ | $ C_2 $ |
|--------------|---------|-----------|-------|---------|---------|
| Abortion     | 279 505 | 671 144   | 2 105 | 326     | 1 801   |
| Brexit       | 22 745  | 48 830    | 476   | 113     | 390     |
| Fracking     | 374 403 | 1 377 085 | 4 156 | 1 595   | 3 103   |
| iPhone       | 36 742  | 49 248    | 4 776 | 339     | 4 478   |
| ObamaCare    | 334 617 | 1 511 670 | 6 614 | 2 404   | 4 527   |
| US-elections | 80 544  | 921 368   | 4 697 | 3 097   | 12 044  |

Table 3: Detailed values of the data presented in Figure 2. The data correspond to the absolute value expected symmetric difference  $n - \Phi$  of Hedge and the baselines for  $k = 20$  across all datasets. Low values are better.

| Heterogeneous setting |          |          |          |          |          |          |
|-----------------------|----------|----------|----------|----------|----------|----------|
| Dataset               | Hedge    | BBLO     | Inters.  | Union    | HighDeg. | Random   |
| Abortion              | 1436.090 | 1447.710 | 1571.180 | 1655.580 | 3414.310 | 4253.220 |
| Brexit                | 17.907   | 17.765   | 31.850   | 27.770   | 54.131   | 87.341   |
| Fracking              | 3411.810 | 3420.700 | 3651.230 | 3825.360 | 5197.060 | 7449.350 |
| iPhone                | 421.411  | 865.126  | 839.119  | 1048.090 | 1189.650 | 631.543  |
| ObamaCare             | 1768.560 | 1828.900 | 1998.250 | 1846.750 | 3315.570 | 4032.140 |
| US-elections          | 515.347  | 516.587  | 1030.640 | 685.089  | 1474.330 | 5988.160 |
| Homogeneous setting   |          |          |          |          |          |          |
| Dataset               | Hedge    | BBLO     | Inters.  | Union    | HighDeg. | Random   |
| Abortion              | 144.898  | 185.569  | 446.462  | 444.766  | 2368.610 | 1279.100 |
| Brexit                | 1.232    | 1.615    | 9.643    | 9.374    | 28.850   | 34.283   |
| Fracking              | 275.143  | 269.404  | 1423.870 | 781.994  | 2529.570 | 2960.720 |
| iPhone                | 14.624   | 19.893   | 79.854   | 80.279   | 895.353  | 759.629  |
| ObamaCare             | 97.319   | 95.062   | 1314.830 | 360.103  | 2253.050 | 2484.330 |
| US-elections          | 64.870   | 103.318  | 128.586  | 104.911  | 1979.79  | 5325.130 |

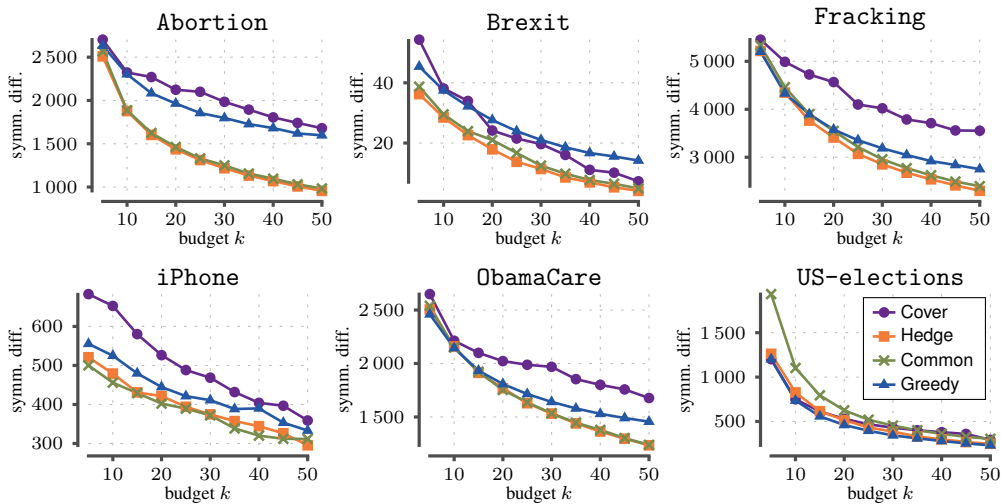

Figure 1: Expected symmetric difference  $n - \Phi_H$  as a function of the budget  $k$ . Heterogeneous model. Low values are better.

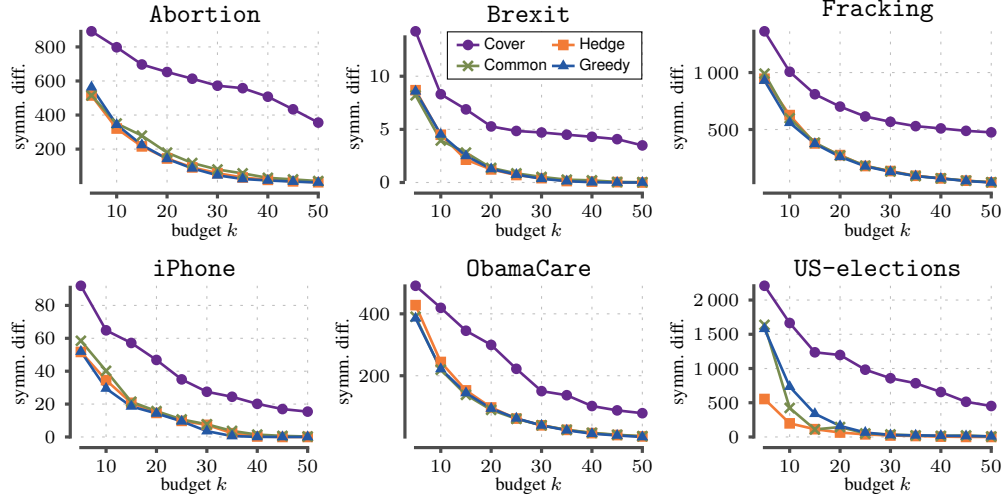

Figure 2: Expected symmetric difference  $n - \Phi_C$  as a function of the budget  $k$ . Correlated model. Low values are better.

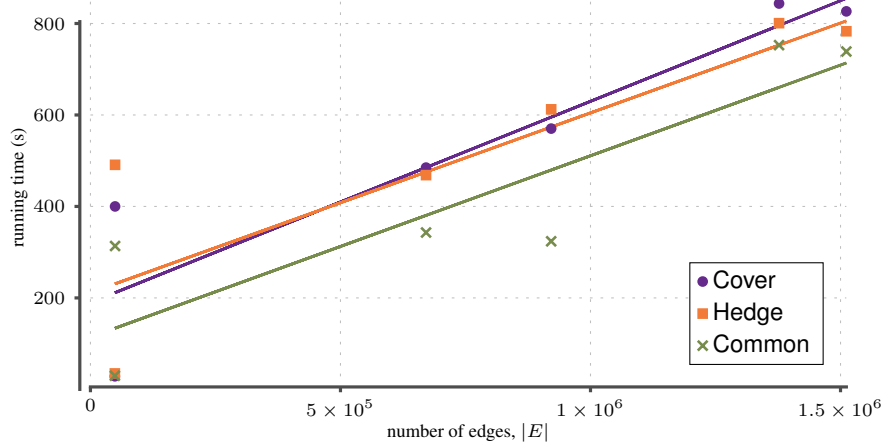

Figure 3: Running time as a function of number of edges. Correlated model with  $k = 20$ .



Side 1  
Pro-Choice

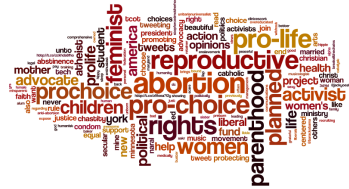

Side 2  
Pro-Life

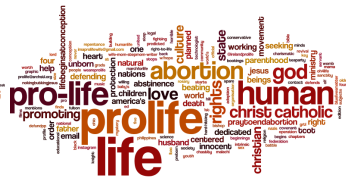

Hedge

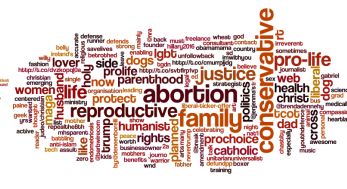

Pro-Remain

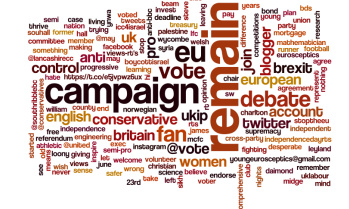

Pro-Leave

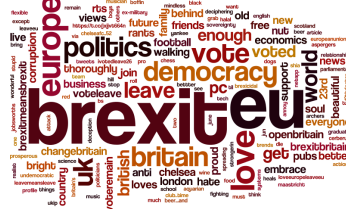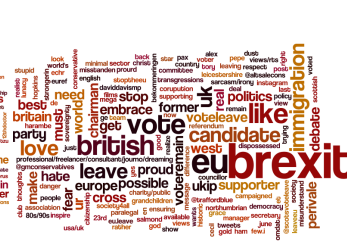

Pro-Fracking

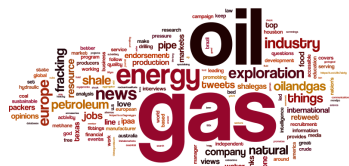

Anti-Fracking

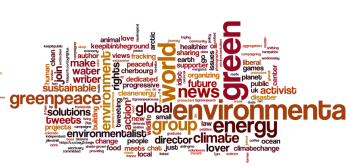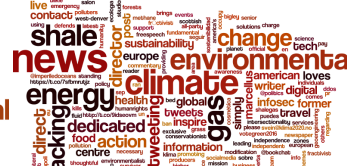

Pro-iPhone

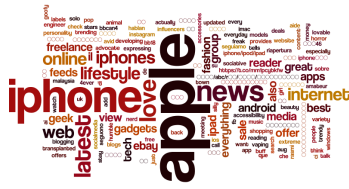

Pro-Samsung

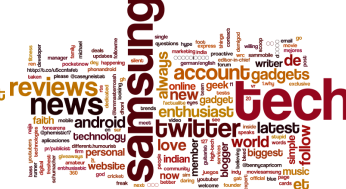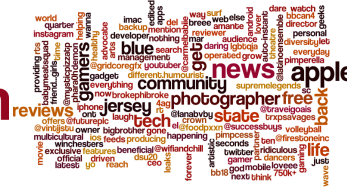

Pro-Obamacare

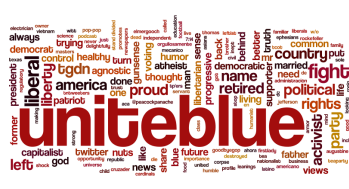

Anti-Obamacare

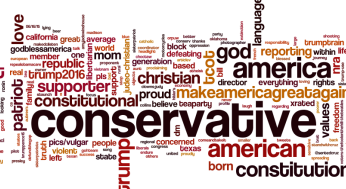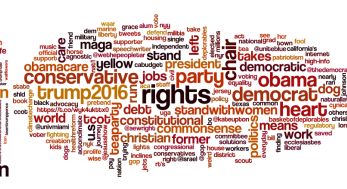

Pro-Hillary

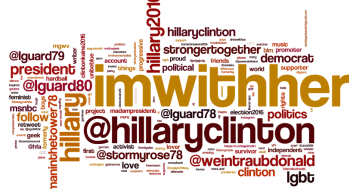

Pro-Trump

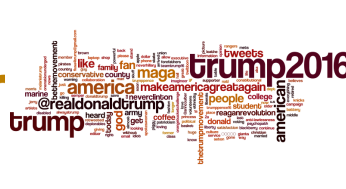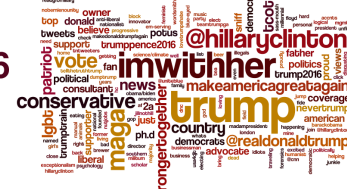

Figure 4: Word clouds of the profiles for the initial seeds, and profiles selected by Hedge.
